# Supplementary material for: The effect of wildlife host hotspots on bovine tuberculosis (bTB) risk dynamics in a disturbance landscape
Source: Research Square preprint supplement (doi:10.21203/rs.3.rs-6973781/v1), 2025-07-10
Supplement: Supplementary file 1 [file d417a78b27ebd84a2022094f.docx]

# Supplementary Material


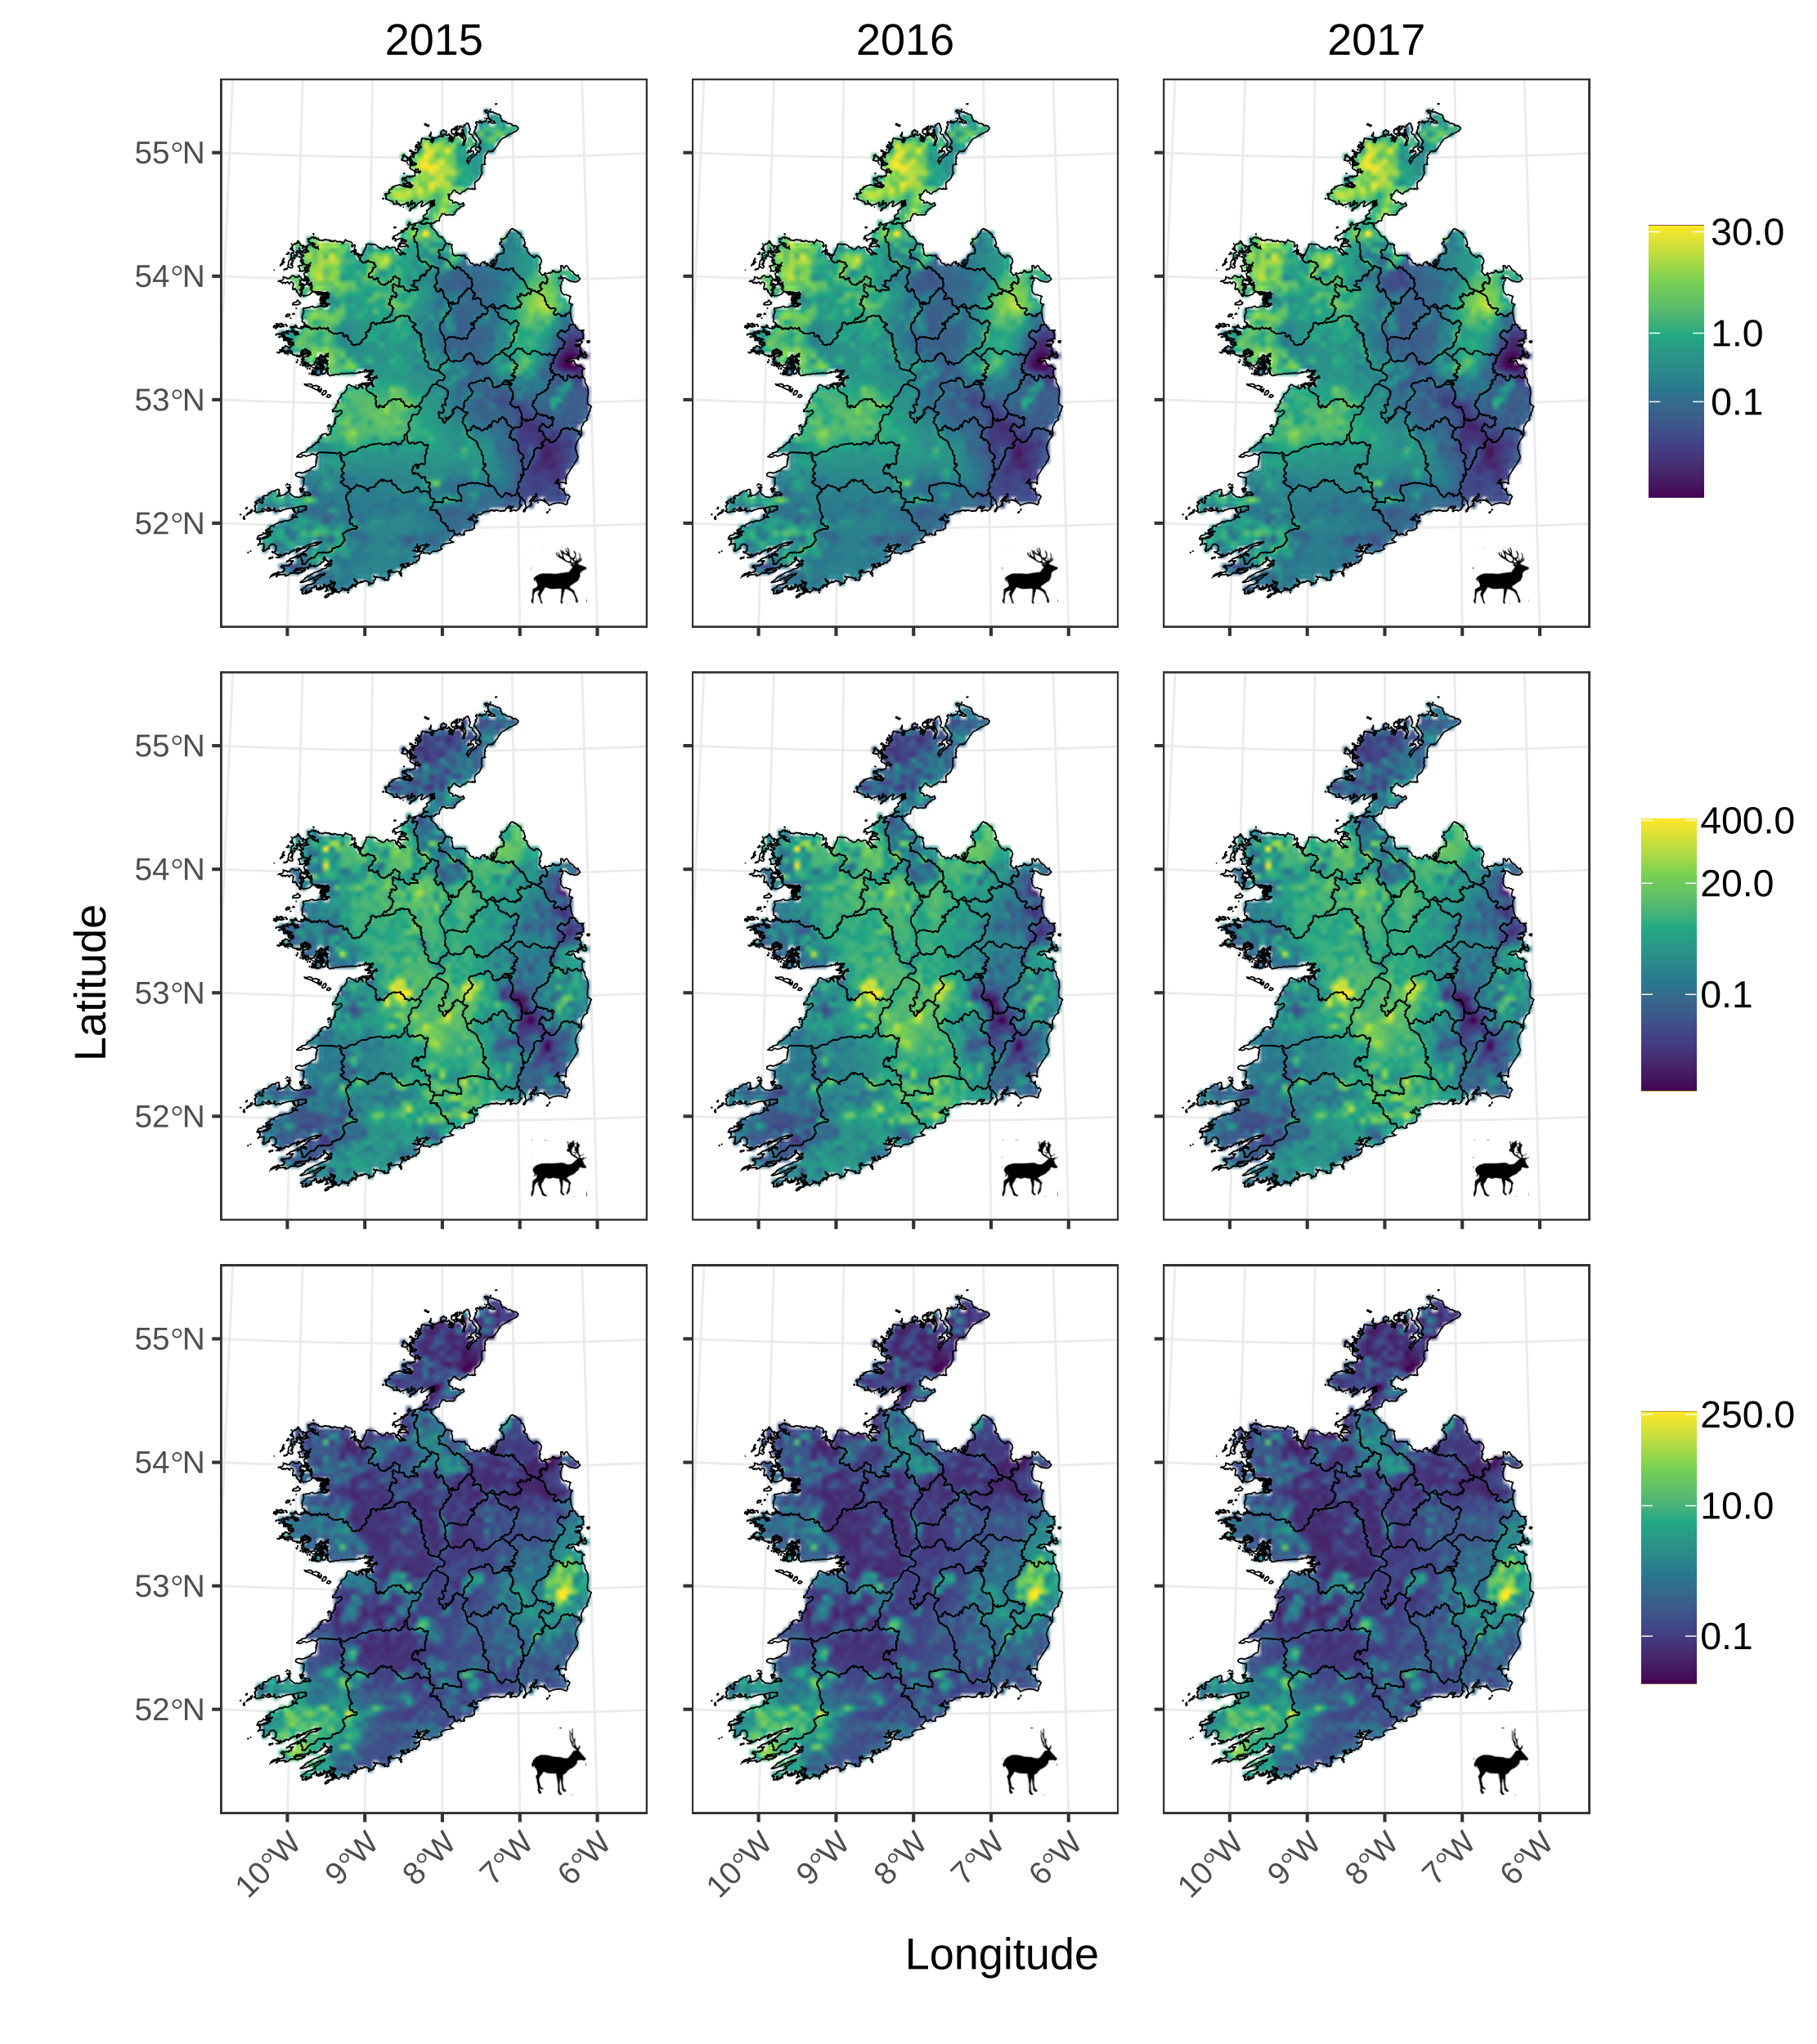


**Supplementary Figure S1:** Interpolated Relative Deer Density Rasters.

Rasters of 2015, 2016, and 2017 relative deer densities per 25 km2. Top row, red deer; middle row, fallow deer; bottom row, sika deer. Relative densities were calculated by linear interpolation of 2012 and 2018 estimates (2012 and 2018 estimates were generated via disaggregated hunting returns by Murphy et al., 2023). Raster resolution is 25 km2.

**
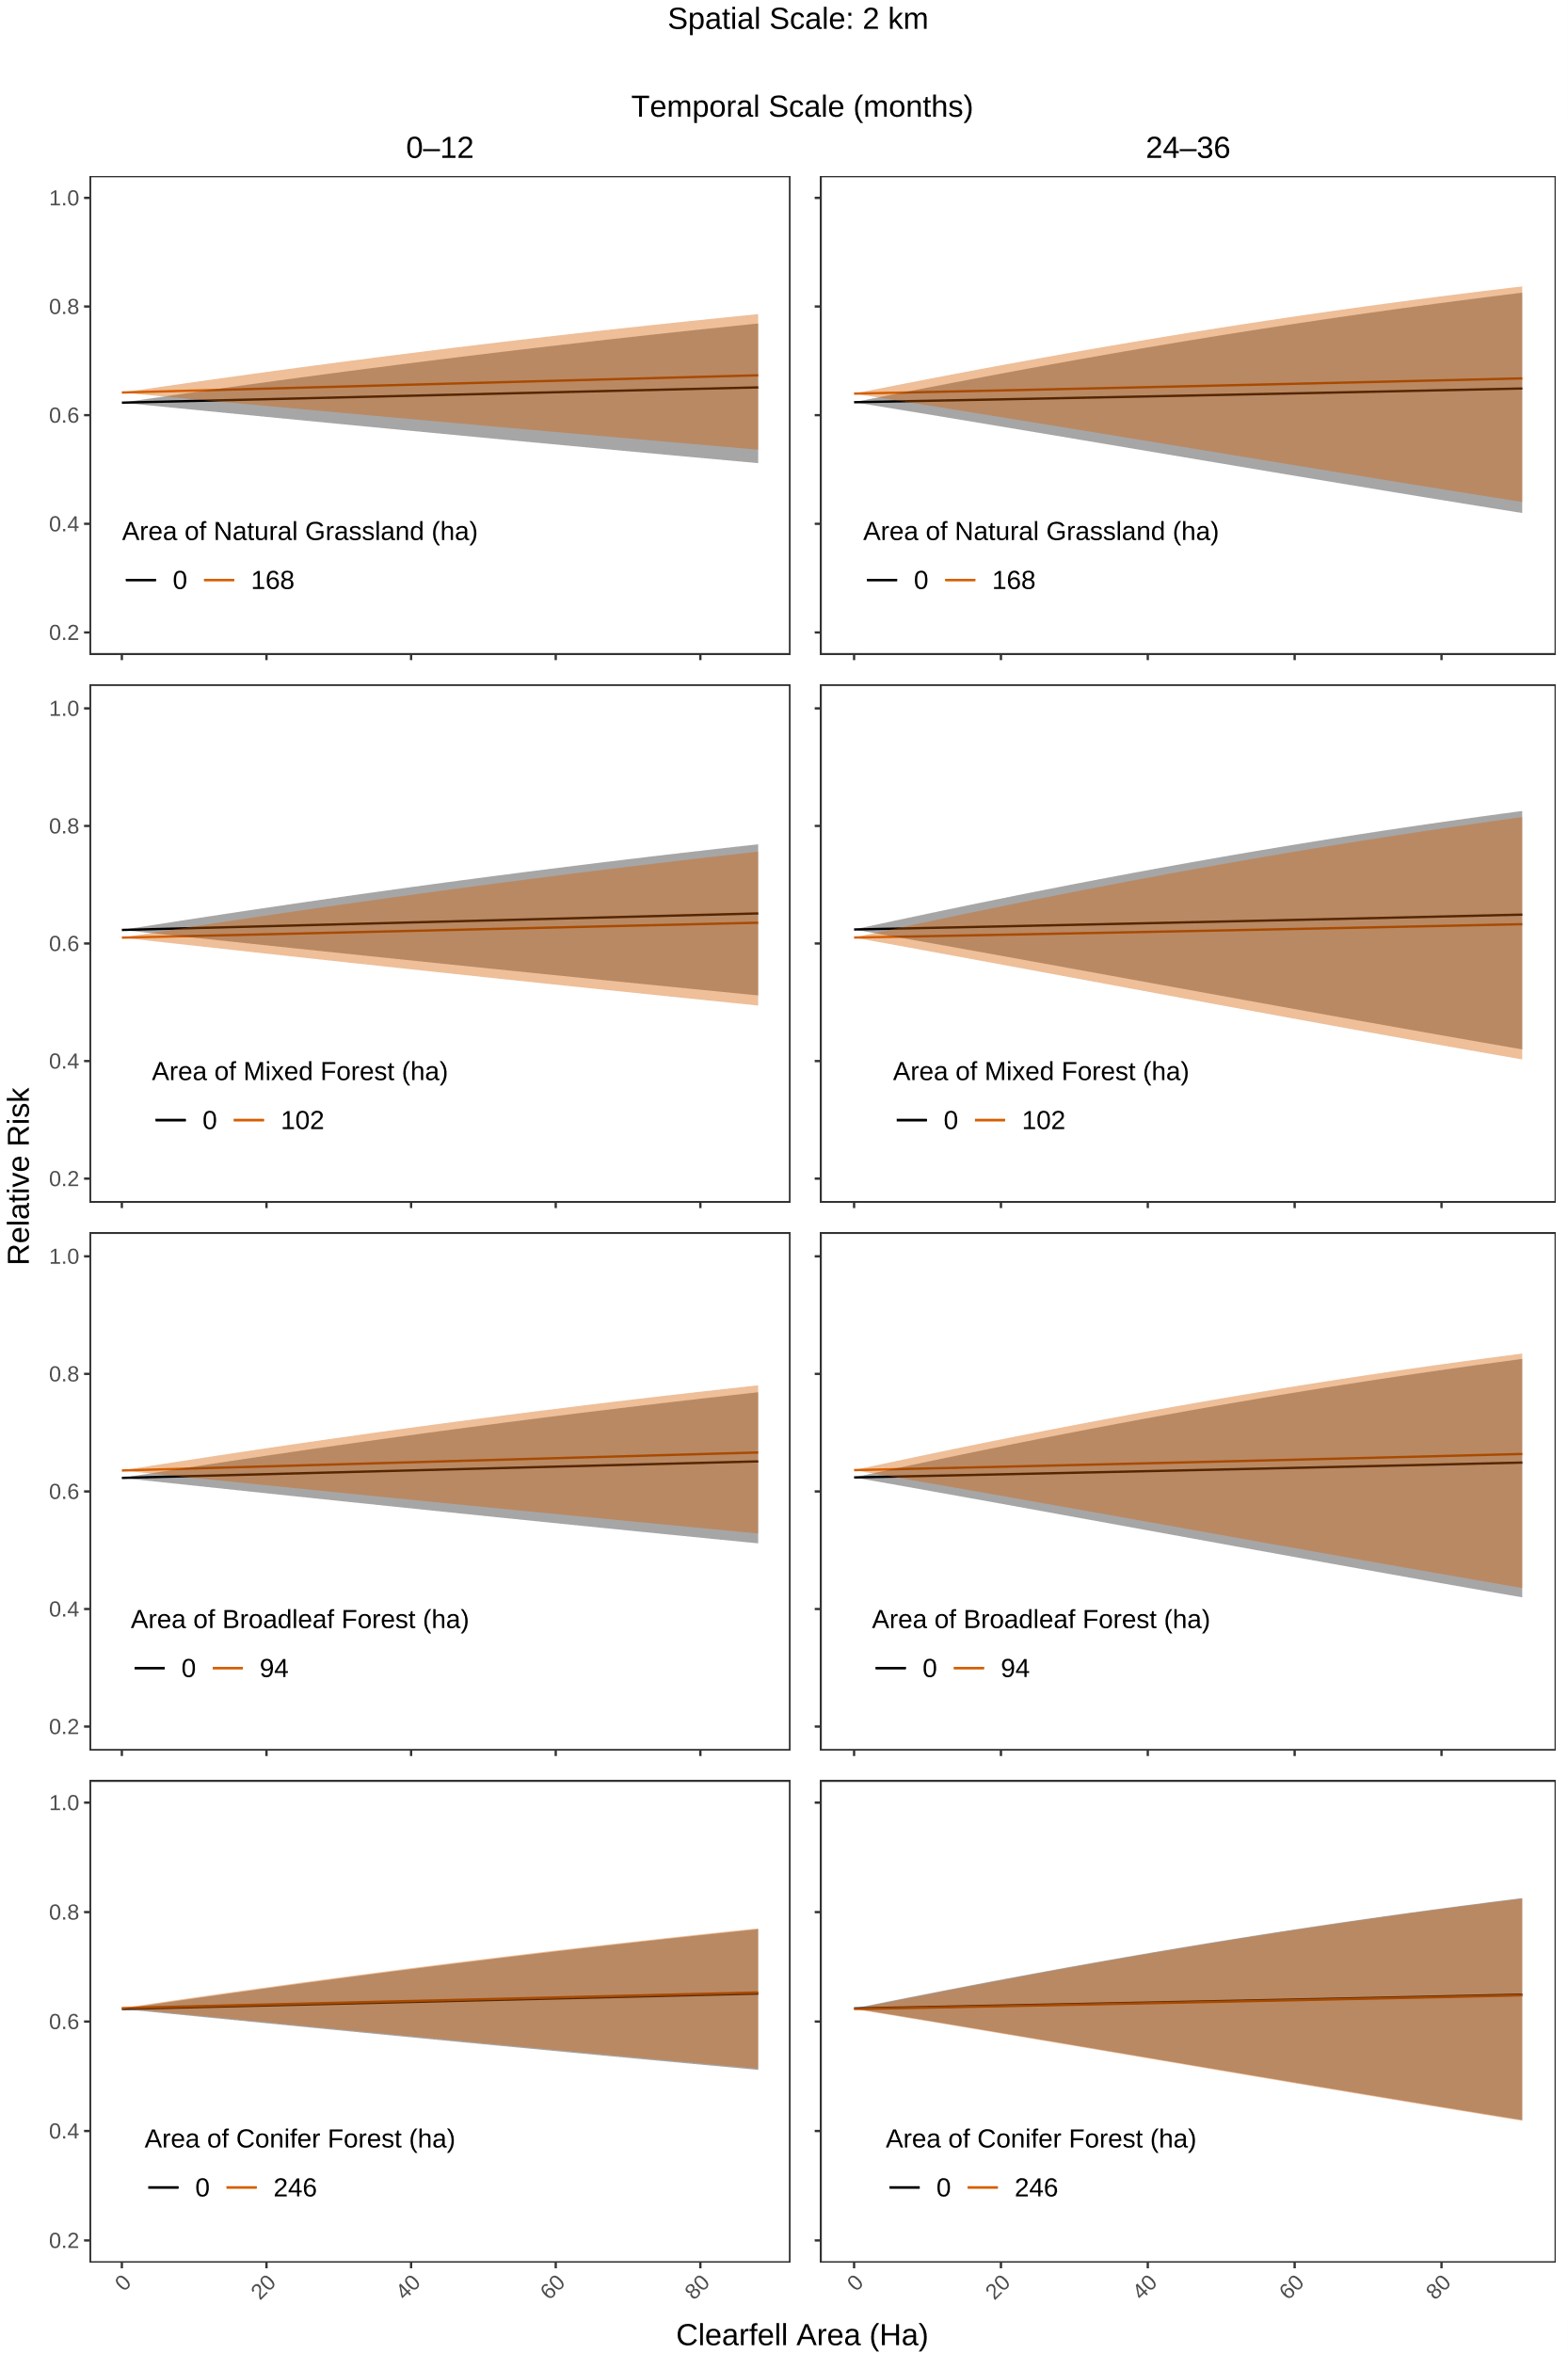
**

**Supplementary Figure S2**: Effect of Clearfell and Habitat Availability in a 2 km Buffer on bTB Breakdown Risk.

Predictions from conditional logistic regression models fit to clearfell data from two temporal scales (clearfell in prior 0–12 months and 24–36 months) within a 2 km buffer of farms. Predictions were made using median values for all predictors except habitat (natural grassland, mixed forest, broadleaf forest, and conifer forest) and clearfell area. The orange lines represent habitat availability at the 90th quantile. Clearfell values until the 90th quantile are shown. Shading denotes 95% conditional confidence intervals.

**
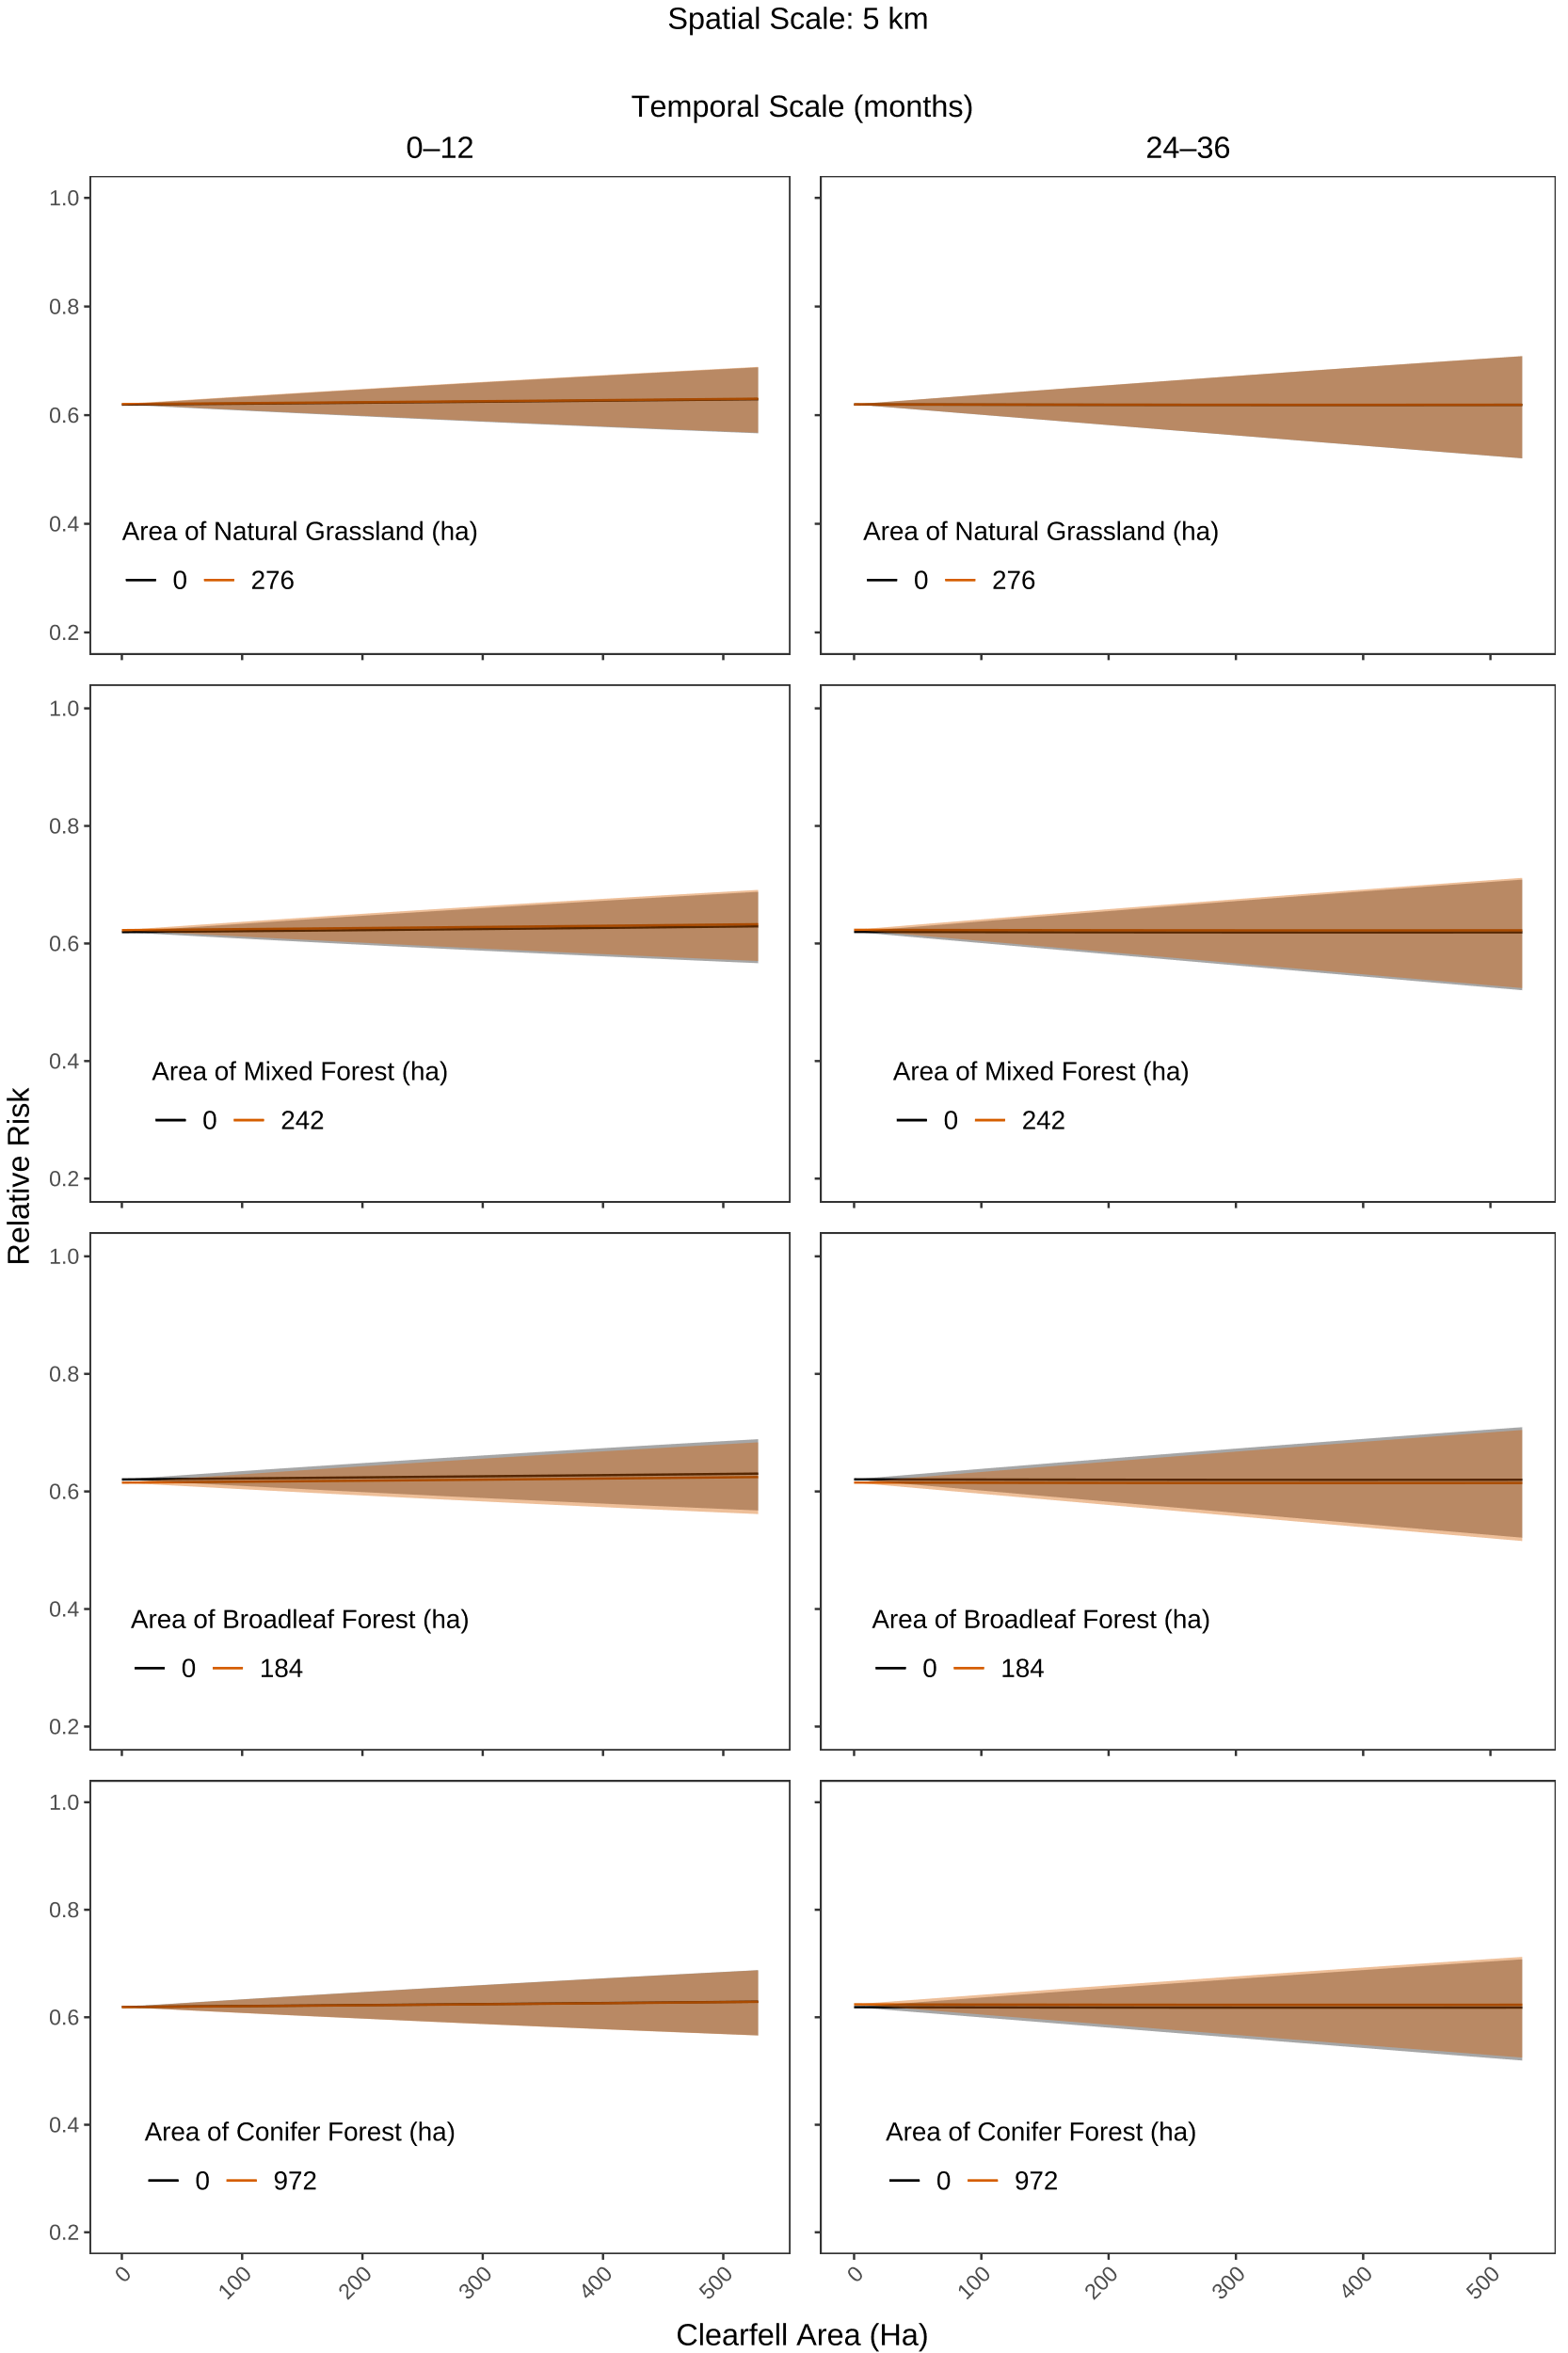
**

**Supplementary Figure S3**: Effect of Clearfell and Habitat Availability in a 5 km Buffer on bTB Breakdown Risk.

Predictions from conditional logistic regression models fit to clearfell data from two temporal scales (clearfell in prior 0–12 months and 24–36 months) within a 5 km buffer of farms. Predictions were made using median values for all predictors except natural grassland area, mixed forest, and clearfell area. The orange lines represent habitat availability at the 90th quantile. Clearfell values until the 90th quantile are shown. Shading denotes 95% conditional confidence intervals.

Supplementary Tables

**Supplementary Table S1:** Sensitivity Analysis for Badger Sett Data Selection.

Akaike Information Criterion (AIC) of conditional logistic regression models representing different spatial and temporal scales and fit to four subsets of badger sett data. Active badger sett density was calculated from the setts classified as active in 2015–2017, 2014–2018, 2013–2019, or 2012–2020. Models are ranked from lowest AIC (highest predictive power, or "top-ranked") to highest AIC to determine which models explain the most variability. The delta values compared to the top-ranked model are shown (ΔAIC). "df" = "degrees of freedom." Italicized and bolded models are presented in the main body of the manuscript.

| **Model** | | | **df** | **AIC** | **ΔAIC** |
| --- | --- | --- | --- | --- | --- |
| **Spatial Buffer**  **(km)** | **Time Lag (months)** | **Subset of Badger Data** |
| ***2*** | ***0–12*** | ***2012–2020*** | ***31*** | ***8029.48*** | ***0.00*** |
| ***5*** | ***24–36*** | ***2012–2020*** | ***31*** | ***8033.60*** | ***4.12*** |
| 2 | 0–12 | 2013–2019 | 31 | 8039.06 | 9.59 |
| ***5*** | ***0–12*** | ***2012–2020*** | ***31*** | ***8040.94*** | ***11.47*** |
| ***2*** | ***24–36*** | ***2012–2020*** | ***31*** | ***8042.17*** | ***12.69*** |
| 5 | 24–36 | 2013–2019 | 31 | 8043.69 | 14.21 |
| 2 | 0–12 | 2014–2018 | 31 | 8048.17 | 18.69 |
| 5 | 0–12 | 2013–2019 | 31 | 8050.13 | 20.65 |
| 5 | 24–36 | 2014–2018 | 31 | 8052.48 | 23.01 |
| 2 | 24–36 | 2013–2019 | 31 | 8052.77 | 23.30 |
| 5 | 0–12 | 2014–2018 | 31 | 8058.72 | 29.24 |
| 2 | 0–12 | 2015–2017 | 31 | 8059.49 | 30.01 |
| 2 | 24–36 | 2014–2018 | 31 | 8062.19 | 32.72 |
| 5 | 24–36 | 2015–2017 | 31 | 8064.50 | 35.03 |
| 5 | 0–12 | 2015–2017 | 31 | 8071.06 | 41.58 |
| 2 | 24–36 | 2015–2017 | 31 | 8074.15 | 44.68 |

**Supplementary Table S2**: Summary of variables selected for model inclusion.

Names, descriptions, and hypothesised effects of variables included in models. Literature-based rationales for each variable were identified prior to inclusion in the models. “Variable × Variable” denotes an interaction term. Table is modified and expanded from Murphy et al. (2022).

| **Variable** | **Definition** | **Rationale and Hypothesised Effect** | **Reference** |
| --- | --- | --- | --- |
| Herd type | Farm enterprise type. Divided into four categories to represent the main cattle farm enterprises in Ireland: Dairy, Beef, Suckler (also known as breeding beef herds) and Other. | We hypothesised that different forms of cattle enterprise would have different animal husbandry and management considerations which would affect bTB risk. We hypothesised that dairy enterprises would have higher relative bTB risk because dairy herds are typically larger; have older average age profile (therefore longer at-risk periods); prominent dairy breeds (e.g., Holstein) may have some genetic predisposition for bTB susceptibility; and the physiological stress on dams. | (Broughan et al., 2016) |
| Elevation | The altitude of the farm, measured in metres above sea level. | Elevation influences the ecology of the farm and the surrounding area, which may influence relative bTB risk after a clearfell. We hypothesised that farms with higher elevation would have lower likelihood of bTB risk because badgers favour habitat under an elevation threshold of 200 m. | (Byrne, Sleeman, et al., 2012) |
| Land parcels | The amount of land subdivisions a farm is composed of. | We hypothesised that the number of land parcel subdivisions would influence bTB risk because farms with more land fragmentation would increase the probability of encounters with wildlife vectors. | (Byrne, Barrett, Breslin, Madden, O’keeffe, et al., 2020) |
| Cattle Number | Mean total number of cattle present on the farm during the study period. | We hypothesised that farms with higher numbers of cattle would be at an increased risk of relative bTB risk due to the likely increased risk of wildlife vector encounters. | (Brooks-Pollock & Keeling, 2009) |
| Natural Grassland Area | The area (in hectares) of natural grassland present within the spatial buffer. | We hypothesised that greater area of natural grassland habitat would increase the likelihood of wildlife vector presence, thus increasing relative bTB risk when present near a farm. | (Reilly & Courtenay, 2007) |
| Mixed Forest Area | The area (in hectares) of mixed forest present within the spatial buffer. | We hypothesised that greater area of mixed forest habitat would increase the likelihood of wildlife vector presence, thus increasing relative bTB risk when present near a farm. | (Winkler & Mathews, 2015) |
| Broadleaf Forest Area | The area (in hectares) of broadleaf forest present within the spatial buffer. | We hypothesised that greater area of broadleaf forest habitat would increase the likelihood of wildlife vector presence, thus increasing relative bTB risk when present near a farm. | (Winkler & Mathews, 2015) |

**Supplementary Table S2** (continued): Summary of variables selected for model inclusion.

Names, descriptions, and hypothesised effects of variables included in models. Literature-based rationales for each variable were identified prior to inclusion in the models. “Variable × Variable” denotes an interaction term. Table is modified and expanded from Murphy et al. (2022).

| **Variable** | **Definition** | **Rationale and Hypothesised Effect** | **Reference** |
| --- | --- | --- | --- |
| Conifer Forest Area | The area (in hectares) of conifer forest present within the spatial buffer. | We hypothesised that greater area of conifer forest habitat would increase the likelihood of wildlife vector presence, thus increasing relative bTB risk when present near a farm. | (Liu & Nieuwenhuis, 2014) |
| Clearfell Area | The area (in hectares) of forest felled during a clearfell event. | Habitat perturbation can influence the infectious disease transmission by modifying movement and dispersal patterns (which can increase contact rates between wildlife and cattle) and increasing stress (which can enhance disease susceptibility and shedding). We hypothesised that larger areas of habitat modification (i.e., clearfell) would increase relative bTB risk for nearby farms due to increased wildlife disturbance. | (Hing et al., 2016)  (Plowright et al., 2021) |
| Badger Active Sett Density | Density of active European badger (*Meles meles*) setts per 25 km2 at the farm centroid. | Badgers are a well-documented maintenance host of bTB in the UK and Ireland. We hypothesised that a higher density of active badger setts would increase relative bTB risk. | (Gallagher & Clifton-Hadley, 2000) |
| Fallow Deer Density | Fallow deer (*Dama dama*) relative density per 25 km2 at the farm centroid. | One semi-quantitative risk assessment conducted with samples from England found (with high uncertainty) that at a local level, fallow deer may pose a as much risk of bTB transmission to cattle as badgers. We hypothesised that at higher densities, fallow deer would increase relative bTB risk. | (Delahay et al., 2007) |
| Red Deer Density | Red deer (*Cervus elaphus*) relative density per 25 km2 at the farm centroid. | bTB can reach high prevalence rates in herds of red deer. High prevalence of bTB in red deer has been associated with bTB breakdowns in the UK. We hypothesised that at higher densities, red deer would increase relative bTB risk. | (Collard, 2023) |
| Sika Deer Density | Sika deer (*Cervus nippon*) relative density per 25 km2 at the farm centroid. | Genotyping studies have implicated sika deer as part of the transmission cycle of bTB infection in cattle, specifically in an area of high deer density (Wicklow County) in Ireland. We hypothesised that at higher densities, sika deer would increase relative bTB risk. | (Crispell et al., 2020) |

**Supplementary Table S2** (continued): Summary of variables selected for model inclusion.

Names, descriptions, and hypothesised effects of variables included in models. Literature-based rationales for each variable were identified prior to inclusion in the models. “Variable × Variable” denotes an interaction term. Table is modified and expanded from Murphy et al. (2022).

| **Variable** | **Definition** | **Rationale and Hypothesised Effect** | **Reference** |
| --- | --- | --- | --- |
| Clearfell Area Badger Active Sett Density | Interaction between the area of forest clearfell (in hectares) and active sett density. | Using suitable habitat availability as a proxy for wildlife presence, Murphy et al. found a significant interaction between habitat availability and extent of clearfell on the risk of bTB breakdown. We hypothesised that greater areas of clearfell in the vicinity of higher badger sett density would result in greater disturbance and influence bTB relative risk in a spatially and temporally dependent manner. | (Murphy et al., 2022) |
| Clearfell Area Fallow Deer Density | Interaction between the area of forest clearfell (in hectares) and relative fallow deer density. | Using suitable habitat availability as a proxy for wildlife presence, Murphy et al. found a significant interaction between habitat availability and extent of clearfell on the risk of bTB breakdown. We hypothesised that greater areas of clearfell in the vicinity of higher fallow deer density would result in greater disturbance and influence bTB relative risk in a spatially and temporally dependent manner. | (Murphy et al., 2022) |
| Clearfell Area Red Deer Density | Interaction between the area of forest clearfell (in hectares) and relative red deer density. | Using suitable habitat availability as a proxy for wildlife presence, Murphy et al. found a significant interaction between habitat availability and extent of clearfell on the risk of bTB breakdown. We hypothesised that greater areas of clearfell in the vicinity of higher red deer density would result in greater disturbance and influence bTB relative risk in a spatially and temporally-dependent manner. | (Murphy et al., 2022) |
| Clearfell Area Sika Deer Density | Interaction between the area of forest clearfell (in hectares) and relative sika deer density. | Using suitable habitat availability as a proxy for wildlife presence, Murphy et al. found a significant interaction between habitat availability and extent of clearfell on the risk of bTB breakdown. We hypothesised that greater areas of clearfell in the vicinity of higher sika deer density would result in greater disturbance and influence bTB relative risk in a spatially and temporally-dependent manner. | (Murphy et al., 2022) |

**Supplementary Table S3**: Summary of model fit to 0–12-month time lag and 2 km buffer data.

Summary of conditional logistic regression model fit to clearfell and habitat data from a 0–12-month time lag and 2 km spatial buffer. “Variable **:** variable” denotes an interaction term; “^2” denotes a quadratic effect. Exponentiated coefficients, “exp(coef),” represent the hazard ratio in this model structure. See **Table 3** for summary of predictor significance.

| **Spatial Scale (km)** | 2 | | **Temporal Scale (months)** | | | 0–12 | |
| --- | --- | --- | --- | --- | --- | --- | --- |
| **Concordance** | 0.741 (*SE* = 0.007) | | **Likelihood ratio test** | | | *p* < 0.001 | |
| **Predictors** | **Exp(coef)** | **Lower .95** | | **Upper .95** | **Pr(>|z|)** | |  |
| Dairy (ref: Beef)a | 4.8437 | 3.8612 | | 6.0763 | <0.001 | | ******* |
| Other (ref: Beef)a | 0.8959 | 0.6165 | | 1.3019 | 0.5643 | |  |
| Suckler (ref: Beef)a | 2.6319 | 2.1455 | | 3.2287 | <0.001 | | ******* |
| Elevation | 0.9988 | 0.9951 | | 1.0025 | 0.5110 | |  |
| Elevation^2 | 1.0000 | 1.0000 | | 1.0000 | 0.1768 | |  |
| LandParcelsb | 1.0123 | 0.9809 | | 1.0447 | 0.4462 | |  |
| LandParcelsb^2 | 1.0001 | 0.9987 | | 1.0016 | 0.8437 | |  |
| CattleNumber | 1.0140 | 1.0116 | | 1.0165 | <0.001 | | ******* |
| CattleNumber^2 | 1.0000 | 1.0000 | | 1.0000 | <0.001 | | ******* |
| NaturalGrasslandc | 1.0061 | 0.9989 | | 1.0133 | 0.0966 | | **.** |
| NaturalGrasslandc^2 | 1.0000 | 0.9999 | | 1.0000 | 0.1566 | |  |
| BroadleafForestc | 1.0013 | 0.9982 | | 1.0045 | 0.4075 | |  |
| BroadleafForestc^2 | 1.0000 | 1.0000 | | 1.0000 | 0.6606 | |  |
| MixedForestc | 0.9973 | 0.9942 | | 1.0003 | 0.0767 | | **.** |
| MixedForestc^2 | 1.0000 | 1.0000 | | 1.0000 | 0.0532 | | **.** |
| ConiferForestc | 1.0000 | 0.9987 | | 1.0013 | 0.9907 | |  |
| ConiferForestd^2 | 1.0000 | 1.0000 | | 1.0000 | 0.8982 | |  |
| Clearfelld | 1.0072 | 0.9997 | | 1.0148 | 0.0593 | | **.** |
| Clearfelld^2 | 1.0000 | 1.0000 | | 1.0000 | 0.6717 | |  |
| FallowDeere | 0.9978 | 0.9856 | | 1.0102 | 0.7306 | |  |
| FallowDeere^2 | 1.0000 | 0.9999 | | 1.0001 | 0.9675 | |  |
| RedDeere | 1.0209 | 0.8861 | | 1.1762 | 0.7746 | |  |
| RedDeere^2 | 0.9959 | 0.9807 | | 1.0113 | 0.5974 | |  |
| SikaDeere | 1.0685 | 1.0216 | | 1.1176 | 0.0038 | | ****** |
| SikaDeere^2 | 0.9990 | 0.9979 | | 1.0001 | 0.0643 | | **.** |
| ActiveSettf | 1.0811 | 1.0459 | | 1.1174 | <0.001 | | ******* |
| ActiveSettf ^2 | 0.9982 | 0.9967 | | 0.9997 | 0.0219 | | ***** |
| Clearfelld **:** FallowDeere | 0.9999 | 0.9992 | | 1.0005 | 0.7223 | |  |
| Clearfelld **:** RedDeere | 0.9911 | 0.9839 | | 0.9985 | 0.0180 | | ***** |
| Clearfelld **:** SikaDeere | 0.9961 | 0.9929 | | 0.9993 | 0.0155 | | ***** |
| Clearfelld **:** ActiveSettf | 0.9998 | 0.9992 | | 1.0004 | 0.5630 | |  |

Herd typea: Beef (reference), Dairy, Suckler, Other.

LandParcelsb: Number of farm subdivisions.

Habitatc: Extent (ha) of each habitat type within the spatial buffer.

Clearfelld: Extent (ha) of forest cut within the spatial buffer during the indicated time lag.

Deere: Relative deer densities (per 25 km2) for 2017 at the farm centroid.

ActiveSettf: Density (per 25 km2) at the farm centroid of active badger setts (from 2012–2020).

Significance codes: 0 ‘***’ 0.001 ‘**’ 0.01 ‘*’ 0.05 ‘.’ 0.1 ‘ ’ 1

**Supplementary Table S4**: Summary of model fit to 24–36-month time lag and 2 km buffer data.

Summary of conditional logistic regression model fit to clearfell and habitat data from a 0–12-month time lag and 2 km spatial buffer. “Variable **:** variable” denotes an interaction term; “^2” denotes a quadratic effect. Exponentiated coefficients, “exp(coef),” represent the hazard ratio in this model structure. See **Table 3** for summary of predictor significance.

| **Spatial Scale (km)** | 2 | | **Temporal Scale (months)** | | | 24–36 | |
| --- | --- | --- | --- | --- | --- | --- | --- |
| **Concordance** | 0.740 (*SE* = 0.007) | | **Likelihood ratio test** | | | *p* < 0.001 | |
| **Predictors** | **Exp(coef)** | **Lower .95** | | **Upper .95** | **Pr(>|z|)** | |  |
| Dairy (ref: Beef)a | 4.8604 | 3.8740 | | 6.0980 | <0.001 | | ******* |
| Other (ref: Beef)a | 0.9032 | 0.6215 | | 1.3125 | 0.5933 | |  |
| Suckler (ref: Beef)a | 2.6320 | 2.1455 | | 3.2288 | <0.001 | | ******* |
| Elevation | 0.9988 | 0.9952 | | 1.0025 | 0.5392 | |  |
| Elevation^2 | 1.0000 | 1.0000 | | 1.0000 | 0.1952 | |  |
| LandParcelsb | 1.0123 | 0.9809 | | 1.0446 | 0.4473 | |  |
| LandParcelsb^2 | 1.0002 | 0.9987 | | 1.0016 | 0.8286 | |  |
| CattleNumber | 1.0140 | 1.0116 | | 1.0164 | <0.001 | | ******* |
| CattleNumber^2 | 1.0000 | 1.0000 | | 1.0000 | <0.001 | | ******* |
| NaturalGrasslandc | 1.0057 | 0.9988 | | 1.0128 | 0.1078 | |  |
| NaturalGrasslandc^2 | 1.0000 | 0.9999 | | 1.0000 | 0.1546 | |  |
| BroadleafForestc | 1.0013 | 0.9982 | | 1.0045 | 0.4115 | |  |
| BroadleafForestc^2 | 1.0000 | 1.0000 | | 1.0000 | 0.6438 | |  |
| MixedForestc | 0.9974 | 0.9943 | | 1.0004 | 0.0940 | | **.** |
| MixedForestc^2 | 1.0000 | 1.0000 | | 1.0000 | 0.0879 | | **.** |
| ConiferForestc | 0.9999 | 0.9987 | | 1.0011 | 0.8843 | |  |
| ConiferForestd^2 | 1.0000 | 1.0000 | | 1.0000 | 0.8842 | |  |
| Clearfelld | 1.0028 | 0.9951 | | 1.0106 | 0.4740 | |  |
| Clearfelld^2 | 1.0000 | 1.0000 | | 1.0000 | 0.9085 | |  |
| FallowDeere | 0.9981 | 0.9855 | | 1.0108 | 0.7661 | |  |
| FallowDeere^2 | 1.0000 | 0.9999 | | 1.0001 | 0.9765 | |  |
| RedDeere | 1.0793 | 0.8938 | | 1.3032 | 0.4278 | |  |
| RedDeere^2 | 0.9847 | 0.9567 | | 1.0136 | 0.2962 | |  |
| SikaDeere | 1.0773 | 1.0197 | | 1.1381 | 0.0079 | | ****** |
| SikaDeere^2 | 0.9987 | 0.9971 | | 1.0002 | 0.0991 | | **.** |
| ActiveSettf | 1.0793 | 1.0444 | | 1.1153 | <0.001 | | ******* |
| ActiveSettf ^2 | 0.9982 | 0.9967 | | 0.9998 | 0.0240 | | ***** |
| Clearfelld **:** FallowDeere | 0.9996 | 0.9988 | | 1.0004 | 0.3350 | |  |
| Clearfelld **:** RedDeere | 0.9909 | 0.9794 | | 1.0026 | 0.1254 | |  |
| Clearfelld **:** SikaDeere | 0.9975 | 0.9937 | | 1.0014 | 0.2099 | |  |
| Clearfelld **:** ActiveSettf | 1.0004 | 0.9995 | | 1.0012 | 0.3870 | |  |

Herd typea: Beef (reference), Dairy, Suckler, Other.

LandParcelsb: Number of farm subdivisions.

Habitatc: Extent (ha) of each habitat type within the spatial buffer.

Clearfelld: Extent (ha) of forest cut within the spatial buffer during the indicated time lag.

Deere: Relative deer densities (per 25 km2) for 2015 at the farm centroid.

ActiveSettf: Density (per 25 km2) at the farm centroid of active badger setts (from 2012–2020).

Significance codes: 0 ‘***’ 0.001 ‘**’ 0.01 ‘*’ 0.05 ‘.’ 0.1 ‘ ’ 1

**Supplementary Table S5**: Summary of model fit to 0–12-month time lag and 5 km buffer data.

Summary of conditional logistic regression model fit to clearfell and habitat data from a 0–12-month time lag and 2 km spatial buffer. “Variable **:** variable” denotes an interaction term; “^2” denotes a quadratic effect. Exponentiated coefficients, “exp(coef),” represent the hazard ratio in this model structure. See **Table 3** for summary of predictor significance.

| **Spatial Scale (km)** | 5 | | **Temporal Scale (months)** | | | 0–12 | |
| --- | --- | --- | --- | --- | --- | --- | --- |
| **Concordance** | 0.741 (*SE* = 0.007) | | **Likelihood ratio test** | | | *p* < 0.001 | |
| **Predictors** | **Exp(coef)** | **Lower .95** | | **Upper .95** | **Pr(>|z|)** | |  |
| Dairy (ref: Beef)a | 4.8376 | 3.8564 | | 6.0683 | <0.001 | | ******* |
| Other (ref: Beef)a | 0.8967 | 0.6170 | | 1.3031 | 0.5674 | |  |
| Suckler (ref: Beef)a | 2.6229 | 2.1380 | | 3.2176 | <0.001 | | ******* |
| Elevation | 0.9988 | 0.9951 | | 1.0025 | 0.5325 | |  |
| Elevation^2 | 1.0000 | 1.0000 | | 1.0000 | 0.1993 | |  |
| LandParcelsb | 1.0113 | 0.9799 | | 1.0436 | 0.4860 | |  |
| LandParcelsb^2 | 1.0002 | 0.9987 | | 1.0016 | 0.8127 | |  |
| CattleNumber | 1.0141 | 1.0116 | | 1.0165 | <0.001 | | ******* |
| CattleNumber^2 | 1.0000 | 1.0000 | | 1.0000 | <0.001 | | ******* |
| NaturalGrasslandc | 1.0010 | 0.9991 | | 1.0029 | 0.3005 | |  |
| NaturalGrasslandc^2 | 1.0000 | 1.0000 | | 1.0000 | 0.1598 | |  |
| BroadleafForestc | 0.9997 | 0.9986 | | 1.0007 | 0.5541 | |  |
| BroadleafForestc^2 | 1.0000 | 1.0000 | | 1.0000 | 0.6196 | |  |
| MixedForestc | 1.0000 | 0.9987 | | 1.0013 | 0.9977 | |  |
| MixedForestc^2 | 1.0000 | 1.0000 | | 1.0000 | 0.7404 | |  |
| ConiferForestc | 1.0000 | 0.9996 | | 1.0004 | 0.9365 | |  |
| ConiferForestd^2 | 1.0000 | 1.0000 | | 1.0000 | 0.8788 | |  |
| Clearfelld | 1.0003 | 0.9997 | | 1.0009 | 0.3113 | |  |
| Clearfelld^2 | 1.0000 | 1.0000 | | 1.0000 | 0.7318 | |  |
| FallowDeere | 0.9977 | 0.9854 | | 1.0101 | 0.7150 | |  |
| FallowDeere^2 | 1.0000 | 0.9999 | | 1.0001 | 0.9605 | |  |
| RedDeere | 1.0148 | 0.8805 | | 1.1697 | 0.8388 | |  |
| RedDeere^2 | 0.9963 | 0.9814 | | 1.0114 | 0.6295 | |  |
| SikaDeere | 1.0810 | 1.0307 | | 1.1337 | 0.0014 | | ****** |
| SikaDeere^2 | 0.9988 | 0.9977 | | 0.9999 | 0.0399 | | ***** |
| ActiveSettf | 1.0816 | 1.0461 | | 1.1183 | <0.001 | | ******* |
| ActiveSettf ^2 | 0.9983 | 0.9967 | | 0.9998 | 0.0263 | | ***** |
| Clearfelld **:** FallowDeere | 1.0000 | 0.9999 | | 1.0000 | 0.5265 | |  |
| Clearfelld **:** RedDeere | 0.9999 | 0.9997 | | 1.0001 | 0.3290 | |  |
| Clearfelld **:** SikaDeere | 0.9999 | 0.9998 | | 1.0000 | 0.0265 | | ***** |
| Clearfelld **:** ActiveSettf | 1.0000 | 0.9999 | | 1.0000 | 0.4916 | |  |

Herd typea: Beef (reference), Dairy, Suckler, Other.

LandParcelsb: Number of farm subdivisions.

Habitatc: Extent (ha) of each habitat type within the spatial buffer.

Clearfelld: Extent (ha) of forest cut within the spatial buffer during the indicated time lag.

Deere: Relative deer densities (per 25 km2) for 2017 at the farm centroid.

ActiveSettf: Density (per 25 km2) at the farm centroid of active badger setts (from 2012–2020).

Significance codes: 0 ‘***’ 0.001 ‘**’ 0.01 ‘*’ 0.05 ‘.’ 0.1 ‘ ’ 1

**Supplementary Table S6**: Summary of model fit to 24–36-month time lag and 5 km buffer data.

Summary of conditional logistic regression model fit to clearfell and habitat data from a 0–12-month time lag and 2 km spatial buffer. “Variable **:** variable” denotes an interaction term; “^2” denotes a quadratic effect. Exponentiated coefficients, “exp(coef),” represent the hazard ratio in this model structure. See **Table 3** for summary of predictor significance.

| **Spatial Scale (km)** | 5 | | **Temporal Scale (months)** | | | 24–36 | |
| --- | --- | --- | --- | --- | --- | --- | --- |
| **Concordance** | 0.742 (*SE* = 0.007) | | **Likelihood ratio test** | | | *p* < 0.001 | |
| **Predictors** | **Exp(coef)** | **Lower .95** | | **Upper .95** | **Pr(>|z|)** | |  |
| Dairy (ref: Beef)a | 4.8751 | 3.8854 | | 6.1168 | <0.001 | | ******* |
| Other (ref: Beef)a | 0.9027 | 0.6211 | | 1.3118 | 0.5914 | |  |
| Suckler (ref: Beef)a | 2.6304 | 2.1441 | | 3.2269 | <0.001 | | ******* |
| Elevation | 0.9989 | 0.9952 | | 1.0026 | 0.5621 | |  |
| Elevation^2 | 1.0000 | 1.0000 | | 1.0000 | 0.2157 | |  |
| LandParcelsb | 1.0114 | 0.9800 | | 1.0437 | 0.4816 | |  |
| LandParcelsb^2 | 1.0002 | 0.9987 | | 1.0016 | 0.8008 | |  |
| CattleNumber | 1.0140 | 1.0116 | | 1.0164 | <0.001 | | ******* |
| CattleNumber^2 | 1.0000 | 1.0000 | | 1.0000 | <0.001 | | ******* |
| NaturalGrasslandc | 1.0010 | 0.9991 | | 1.0029 | 0.2936 | |  |
| NaturalGrasslandc^2 | 1.0000 | 1.0000 | | 1.0000 | 0.1467 | |  |
| BroadleafForestc | 0.9997 | 0.9986 | | 1.0008 | 0.5628 | |  |
| BroadleafForestc^2 | 1.0000 | 1.0000 | | 1.0000 | 0.6625 | |  |
| MixedForestc | 1.0000 | 0.9987 | | 1.0012 | 0.9397 | |  |
| MixedForestc^2 | 1.0000 | 1.0000 | | 1.0000 | 0.6397 | |  |
| ConiferForestc | 1.0000 | 0.9997 | | 1.0004 | 0.8519 | |  |
| ConiferForestd^2 | 1.0000 | 1.0000 | | 1.0000 | 0.9068 | |  |
| Clearfelld | 1.0003 | 0.9995 | | 1.0010 | 0.4664 | |  |
| Clearfelld^2 | 1.0000 | 1.0000 | | 1.0000 | 0.2903 | |  |
| FallowDeere | 0.9970 | 0.9844 | | 1.0097 | 0.6376 | |  |
| FallowDeere^2 | 1.0000 | 0.9999 | | 1.0001 | 0.9555 | |  |
| RedDeere | 1.1161 | 0.9241 | | 1.3481 | 0.2542 | |  |
| RedDeere^2 | 0.9812 | 0.9537 | | 1.0095 | 0.1903 | |  |
| SikaDeere | 1.0995 | 1.0360 | | 1.1669 | 0.0018 | | ****** |
| SikaDeere^2 | 0.9982 | 0.9965 | | 1.0000 | 0.0437 | | ***** |
| ActiveSettf | 1.0802 | 1.0452 | | 1.1164 | <0.001 | | ******* |
| ActiveSettf ^2 | 0.9983 | 0.9968 | | 0.9998 | 0.0264 | | ***** |
| Clearfelld **:** FallowDeere | 1.0000 | 0.9999 | | 1.0000 | 0.4299 | |  |
| Clearfelld **:** RedDeere | 0.9991 | 0.9982 | | 1.0001 | 0.0729 | | **.** |
| Clearfelld **:** SikaDeere | 0.9998 | 0.9996 | | 1.0000 | 0.0350 | | ***** |
| Clearfelld **:** ActiveSettf | 1.0000 | 0.9999 | | 1.0000 | 0.7146 | |  |

Herd typea: Beef (reference), Dairy, Suckler, Other.

LandParcelsb: Number of farm subdivisions.

Habitatc: Extent (ha) of each habitat type within the spatial buffer.

Clearfelld: Extent (ha) of forest cut within the spatial buffer during the indicated time lag.

Deere: Relative deer densities (per 25 km2) for 2015 at the farm centroid.

ActiveSettf: Density (per 25 km2) at the farm centroid of active badger setts (from 2012–2020).

Significance codes: 0 ‘***’ 0.001 ‘**’ 0.01 ‘*’ 0.05 ‘.’ 0.1 ‘ ’ 1

**Supplementary Table S7**: Summary of model fit to 12–24-month time lag and 2 km buffer data, excluding County Wicklow.

Summary of conditional logistic regression model fit to clearfell and habitat data from a 0–12-month time lag and 2 km spatial buffer, excluding County Wicklow farms. “Variable **:** variable” denotes an interaction term; “^2” denotes a quadratic effect. Exponentiated coefficients, “exp(coef),” represent the hazard ratio in this model structure.

| **Spatial Scale (km)** | 2 | | **Temporal Scale (months)** | | | 12–24 | |
| --- | --- | --- | --- | --- | --- | --- | --- |
| **Concordance** | 0.743 (*SE* = 0.007) | | **Likelihood ratio test** | | | *p* < 0.001 | |
| **Predictors** | **Exp(coef)** | **Lower .95** | | **Upper .95** | **Pr(>|z|)** | |  |
| Dairy (ref: Beef)a | 4.9858 | 3.9531 | | 6.2884 | <0.001 | | ******* |
| Other (ref: Beef)a | 0.8603 | 0.5837 | | 1.2679 | 0.4469 | |  |
| Suckler (ref: Beef)a | 2.6831 | 2.1750 | | 3.3099 | <0.001 | | ******* |
| Elevation | 0.9991 | 0.9952 | | 1.0030 | 0.6421 | |  |
| Elevation^2 | 1.0000 | 1.0000 | | 1.0000 | 0.2594 | |  |
| LandParcelsb | 1.0106 | 0.9792 | | 1.0430 | 0.5135 | |  |
| LandParcelsb^2 | 1.0002 | 0.9988 | | 1.0017 | 0.7531 | |  |
| CattleNumber | 1.0140 | 1.0115 | | 1.0164 | <0.001 | | ******* |
| CattleNumber^2 | 1.0000 | 1.0000 | | 1.0000 | <0.001 | | ******* |
| NaturalGrasslandc | 1.0067 | 0.9991 | | 1.0144 | 0.0847 | | **.** |
| NaturalGrasslandc^2 | 1.0000 | 0.9999 | | 1.0000 | 0.1483 | |  |
| BroadleafForestc | 1.0014 | 0.9982 | | 1.0046 | 0.3809 | |  |
| BroadleafForestc^2 | 1.0000 | 1.0000 | | 1.0000 | 0.6198 | |  |
| MixedForestc | 0.9976 | 0.9945 | | 1.0007 | 0.1268 | |  |
| MixedForestc^2 | 1.0000 | 1.0000 | | 1.0000 | 0.0877 | | **.** |
| ConiferForestc | 1.0001 | 0.9988 | | 1.0015 | 0.8705 | |  |
| ConiferForestd^2 | 1.0000 | 1.0000 | | 1.0000 | 0.9879 | |  |
| Clearfelld | 1.0074 | 0.9998 | | 1.0151 | 0.0563 | | **.** |
| Clearfelld^2 | 1.0000 | 1.0000 | | 1.0000 | 0.6997 | |  |
| FallowDeere | 0.9984 | 0.9861 | | 1.0108 | 0.7953 | |  |
| FallowDeere^2 | 1.0000 | 0.9999 | | 1.0001 | 0.9768 | |  |
| RedDeere | 1.0090 | 0.8758 | | 1.1625 | 0.9008 | |  |
| RedDeere^2 | 0.9969 | 0.9818 | | 1.0122 | 0.6857 | |  |
| SikaDeere | 1.0079 | 0.9432 | | 1.0771 | 0.8158 | |  |
| SikaDeere^2 | 0.9996 | 0.9977 | | 1.0016 | 0.6977 | |  |
| ActiveSettf | 1.0760 | 1.0411 | | 1.1120 | <0.001 | | ******* |
| ActiveSettf ^2 | 0.9984 | 0.9969 | | 0.9999 | 0.0354 | | ***** |
| Clearfelld **:** FallowDeere | 0.9999 | 0.9993 | | 1.0006 | 0.8092 | |  |
| Clearfelld **:** RedDeere | 0.9909 | 0.9834 | | 0.9985 | 0.0191 | | ***** |
| Clearfelld **:** SikaDeere | 0.9962 | 0.9925 | | 0.9999 | 0.0416 | | ***** |
| Clearfelld **:** ActiveSettf | 0.9997 | 0.9991 | | 1.0004 | 0.4270 | |  |

Herd typea: Beef (reference), Dairy, Suckler, Other.

LandParcelsb: Number of farm subdivisions.

Habitatc: Extent (ha) of each habitat type within the spatial buffer.

Clearfelld: Extent (ha) of forest cut within the spatial buffer during the indicated time lag.

Deere: Relative deer densities (per 25 km2) for 2015 at the farm centroid.

ActiveSettf: Density (per 25 km2) at the farm centroid of active badger setts (from 2012–2020).

Significance codes: 0 ‘***’ 0.001 ‘**’ 0.01 ‘*’ 0.05 ‘.’ 0.1 ‘ ’ 1

**Supplementary Table S8**: Summary of model fit to 24–36-month time lag and 2 km buffer data, excluding County Wicklow.

Summary of conditional logistic regression model fit to clearfell and habitat data from a 0–12-month time lag and 2 km spatial buffer, excluding County Wicklow farms. “Variable **:** variable” denotes an interaction term; “^2” denotes a quadratic effect. Exponentiated coefficients, “exp(coef),” represent the hazard ratio in this model structure.

| **Spatial Scale (km)** | 2 | | **Temporal Scale (months)** | | | 24–36 | |
| --- | --- | --- | --- | --- | --- | --- | --- |
| **Concordance** | 0.743 (*SE* = 0.007) | | **Likelihood ratio test** | | | *p* < 0.001 | |
| **Predictors** | **Exp(coef)** | **Lower .95** | | **Upper .95** | **Pr(>|z|)** | |  |
| Dairy (ref: Beef)a | 5.0006 | 3.9645 | | 6.3074 | <0.001 | | ******* |
| Other (ref: Beef)a | 0.8658 | 0.5875 | | 1.2761 | 0.4667 | |  |
| Suckler (ref: Beef)a | 2.6845 | 2.1761 | | 3.3117 | <0.001 | | ******* |
| Elevation | 0.9991 | 0.9952 | | 1.0030 | 0.6486 | |  |
| Elevation^2 | 1.0000 | 1.0000 | | 1.0000 | 0.2671 | |  |
| LandParcelsb | 1.0102 | 0.9789 | | 1.0425 | 0.5277 | |  |
| LandParcelsb^2 | 1.0002 | 0.9988 | | 1.0017 | 0.7369 | |  |
| CattleNumber | 1.0139 | 1.0115 | | 1.0164 | <0.001 | | ******* |
| CattleNumber^2 | 1.0000 | 1.0000 | | 1.0000 | <0.001 | | ******* |
| NaturalGrasslandc | 1.0062 | 0.9988 | | 1.0137 | 0.1006 | |  |
| NaturalGrasslandc^2 | 1.0000 | 0.9999 | | 1.0000 | 0.1487 | |  |
| BroadleafForestc | 1.0014 | 0.9982 | | 1.0046 | 0.3962 | |  |
| BroadleafForestc^2 | 1.0000 | 1.0000 | | 1.0000 | 0.6148 | |  |
| MixedForestc | 0.9977 | 0.9946 | | 1.0008 | 0.1512 | |  |
| MixedForestc^2 | 1.0000 | 1.0000 | | 1.0000 | 0.1492 | |  |
| ConiferForestc | 1.0000 | 0.9987 | | 1.0013 | 0.9537 | |  |
| ConiferForestd^2 | 1.0000 | 1.0000 | | 1.0000 | 0.9745 | |  |
| Clearfelld | 1.0028 | 0.9950 | | 1.0107 | 0.4832 | |  |
| Clearfelld^2 | 1.0000 | 1.0000 | | 1.0000 | 0.9222 | |  |
| FallowDeere | 0.9984 | 0.9858 | | 1.0112 | 0.8082 | |  |
| FallowDeere^2 | 1.0000 | 0.9999 | | 1.0001 | 0.9945 | |  |
| RedDeere | 1.0675 | 0.8841 | | 1.2889 | 0.4971 | |  |
| RedDeere^2 | 0.9860 | 0.9581 | | 1.0148 | 0.3370 | |  |
| SikaDeere | 1.0090 | 0.9265 | | 1.0989 | 0.8370 | |  |
| SikaDeere^2 | 0.9994 | 0.9964 | | 1.0024 | 0.7035 | |  |
| ActiveSettf | 1.0737 | 1.0391 | | 1.1094 | <0.001 | | ******* |
| ActiveSettf ^2 | 0.9984 | 0.9970 | | 0.9999 | 0.0402 | | ***** |
| Clearfelld **:** FallowDeere | 0.9996 | 0.9988 | | 1.0004 | 0.3431 | |  |
| Clearfelld **:** RedDeere | 0.9908 | 0.9792 | | 1.0027 | 0.1283 | |  |
| Clearfelld **:** SikaDeere | 0.9980 | 0.9938 | | 1.0022 | 0.3561 | |  |
| Clearfelld **:** ActiveSettf | 1.0003 | 0.9995 | | 1.0012 | 0.4040 | |  |

Herd typea: Beef (reference), Dairy, Suckler, Other.

LandParcelsb: Number of farm subdivisions.

Habitatc: Extent (ha) of each habitat type within the spatial buffer.

Clearfelld: Extent (ha) of forest cut within the spatial buffer during the indicated time lag.

Deere: Relative deer densities (per 25 km2) for 2015 at the farm centroid.

ActiveSettf: Density (per 25 km2) at the farm centroid of active badger setts (from 2012–2020).

Significance codes: 0 ‘***’ 0.001 ‘**’ 0.01 ‘*’ 0.05 ‘.’ 0.1 ‘ ’ 1

**Supplementary Table S9**: Summary of model fit to 12–24-month time lag and 5 km buffer data, excluding County Wicklow.

Summary of conditional logistic regression model fit to clearfell and habitat data from a 0–12-month time lag and 2 km spatial buffer, excluding County Wicklow farms. “Variable **:** variable” denotes an interaction term; “^2” denotes a quadratic effect. Exponentiated coefficients, “exp(coef),” represent the hazard ratio in this model structure.

| **Spatial Scale (km)** | 5 | | **Temporal Scale (months)** | | | 12–24 | |
| --- | --- | --- | --- | --- | --- | --- | --- |
| **Concordance** | 0.743 (*SE* = 0.007) | | **Likelihood ratio test** | | | *p* < 0.001 | |
| **Predictors** | **Exp(coef)** | **Lower .95** | | **Upper .95** | **Pr(>|z|)** | |  |
| Dairy (ref: Beef)a | 4.9842 | 3.9518 | | 6.2863 | <0.001 | | ******* |
| Other (ref: Beef)a | 0.8609 | 0.5841 | | 1.2688 | 0.4491 | |  |
| Suckler (ref: Beef)a | 2.6771 | 2.1701 | | 3.3025 | <0.001 | | ******* |
| Elevation | 0.9991 | 0.9952 | | 1.0030 | 0.6645 | |  |
| Elevation^2 | 1.0000 | 1.0000 | | 1.0000 | 0.2916 | |  |
| LandParcelsb | 1.0095 | 0.9781 | | 1.0419 | 0.5564 | |  |
| LandParcelsb^2 | 1.0003 | 0.9988 | | 1.0017 | 0.7188 | |  |
| CattleNumber | 1.0140 | 1.0115 | | 1.0164 | <0.001 | | ******* |
| CattleNumber^2 | 1.0000 | 1.0000 | | 1.0000 | <0.001 | | ******* |
| NaturalGrasslandc | 1.0013 | 0.9992 | | 1.0033 | 0.2203 | |  |
| NaturalGrasslandc^2 | 1.0000 | 1.0000 | | 1.0000 | 0.1340 | |  |
| BroadleafForestc | 0.9997 | 0.9986 | | 1.0008 | 0.6291 | |  |
| BroadleafForestc^2 | 1.0000 | 1.0000 | | 1.0000 | 0.7134 | |  |
| MixedForestc | 1.0001 | 0.9989 | | 1.0014 | 0.8339 | |  |
| MixedForestc^2 | 1.0000 | 1.0000 | | 1.0000 | 0.9384 | |  |
| ConiferForestc | 1.0000 | 0.9997 | | 1.0004 | 0.9113 | |  |
| ConiferForestd^2 | 1.0000 | 1.0000 | | 1.0000 | 0.9918 | |  |
| Clearfelld | 1.0003 | 0.9997 | | 1.0010 | 0.2906 | |  |
| Clearfelld^2 | 1.0000 | 1.0000 | | 1.0000 | 0.6844 | |  |
| FallowDeere | 0.9983 | 0.9859 | | 1.0109 | 0.7906 | |  |
| FallowDeere^2 | 1.0000 | 0.9999 | | 1.0001 | 0.9585 | |  |
| RedDeere | 1.0049 | 0.8718 | | 1.1583 | 0.9465 | |  |
| RedDeere^2 | 0.9970 | 0.9822 | | 1.0120 | 0.6915 | |  |
| SikaDeere | 1.0208 | 0.9519 | | 1.0947 | 0.5639 | |  |
| SikaDeere^2 | 0.9994 | 0.9974 | | 1.0014 | 0.5596 | |  |
| ActiveSettf | 1.0771 | 1.0418 | | 1.1134 | <0.001 | | ******* |
| ActiveSettf ^2 | 0.9984 | 0.9969 | | 0.9999 | 0.0412 | | ***** |
| Clearfelld **:** FallowDeere | 1.0000 | 0.9999 | | 1.0000 | 0.5537 | |  |
| Clearfelld **:** RedDeere | 0.9999 | 0.9997 | | 1.0001 | 0.3378 | |  |
| Clearfelld **:** SikaDeere | 0.9999 | 0.9997 | | 1.0000 | 0.0657 | | **.** |
| Clearfelld **:** ActiveSettf | 1.0000 | 0.9999 | | 1.0000 | 0.2907 | |  |

Herd typea: Beef (reference), Dairy, Suckler, Other.

LandParcelsb: Number of farm subdivisions.

Habitatc: Extent (ha) of each habitat type within the spatial buffer.

Clearfelld: Extent (ha) of forest cut within the spatial buffer during the indicated time lag.

Deere: Relative deer densities (per 25 km2) for 2015 at the farm centroid.

ActiveSettf: Density (per 25 km2) at the farm centroid of active badger setts (from 2012–2020).

Significance codes: 0 ‘***’ 0.001 ‘**’ 0.01 ‘*’ 0.05 ‘.’ 0.1 ‘ ’ 1

**Supplementary Table S10**: Summary of model fit to 24–36-month time lag and 5 km buffer data, excluding County Wicklow.

Summary of conditional logistic regression model fit to clearfell and habitat data from a 0–12-month time lag and 2 km spatial buffer, excluding County Wicklow farms. “Variable **:** variable” denotes an interaction term; “^2” denotes a quadratic effect. Exponentiated coefficients, “exp(coef),” represent the hazard ratio in this model structure.

| **Spatial Scale (km)** | 5 | | **Temporal Scale (months)** | | | 24–36 | |
| --- | --- | --- | --- | --- | --- | --- | --- |
| **Concordance** | 0.744 (*SE* = 0.007) | | **Likelihood ratio test** | | | *p* < 0.001 | |
| **Predictors** | **Exp(coef)** | **Lower .95** | | **Upper .95** | **Pr(>|z|)** | |  |
| Dairy (ref: Beef)a | 5.0160 | 3.9763 | | 6.3275 | <0.001 | | ******* |
| Other (ref: Beef)a | 0.8661 | 0.5876 | | 1.2766 | 0.4677 | |  |
| Suckler (ref: Beef)a | 2.6826 | 2.1745 | | 3.3094 | <0.001 | | ******* |
| Elevation | 0.9991 | 0.9952 | | 1.0030 | 0.6525 | |  |
| Elevation^2 | 1.0000 | 1.0000 | | 1.0000 | 0.2818 | |  |
| LandParcelsb | 1.0093 | 0.9779 | | 1.0416 | 0.5670 | |  |
| LandParcelsb^2 | 1.0003 | 0.9989 | | 1.0017 | 0.7000 | |  |
| CattleNumber | 1.0139 | 1.0115 | | 1.0164 | <0.001 | | ******* |
| CattleNumber^2 | 1.0000 | 1.0000 | | 1.0000 | <0.001 | | ******* |
| NaturalGrasslandc | 1.0013 | 0.9992 | | 1.0033 | 0.2247 | |  |
| NaturalGrasslandc^2 | 1.0000 | 1.0000 | | 1.0000 | 0.1248 | |  |
| BroadleafForestc | 0.9997 | 0.9986 | | 1.0008 | 0.6118 | |  |
| BroadleafForestc^2 | 1.0000 | 1.0000 | | 1.0000 | 0.7441 | |  |
| MixedForestc | 1.0001 | 0.9988 | | 1.0013 | 0.9133 | |  |
| MixedForestc^2 | 1.0000 | 1.0000 | | 1.0000 | 0.8097 | |  |
| ConiferForestc | 1.0000 | 0.9997 | | 1.0004 | 0.8252 | |  |
| ConiferForestd^2 | 1.0000 | 1.0000 | | 1.0000 | 0.8696 | |  |
| Clearfelld | 1.0003 | 0.9996 | | 1.0011 | 0.3853 | |  |
| Clearfelld^2 | 1.0000 | 1.0000 | | 1.0000 | 0.3427 | |  |
| FallowDeere | 0.9974 | 0.9848 | | 1.0102 | 0.6920 | |  |
| FallowDeere^2 | 1.0000 | 0.9999 | | 1.0001 | 0.9443 | |  |
| RedDeere | 1.1098 | 0.9190 | | 1.3402 | 0.2792 | |  |
| RedDeere^2 | 0.9818 | 0.9545 | | 1.0098 | 0.2005 | |  |
| SikaDeere | 1.0308 | 0.9442 | | 1.1255 | 0.4978 | |  |
| SikaDeere^2 | 0.9989 | 0.9959 | | 1.0020 | 0.4943 | |  |
| ActiveSettf | 1.0749 | 1.0402 | | 1.1107 | <0.001 | | ******* |
| ActiveSettf ^2 | 0.9985 | 0.9970 | | 1.0000 | 0.0432 | | ***** |
| Clearfelld **:** FallowDeere | 1.0000 | 0.9999 | | 1.0000 | 0.3615 | |  |
| Clearfelld **:** RedDeere | 0.9990 | 0.9981 | | 1.0000 | 0.0531 | | **.** |
| Clearfelld **:** SikaDeere | 0.9998 | 0.9997 | | 1.0000 | 0.1278 | |  |
| Clearfelld **:** ActiveSettf | 1.0000 | 0.9999 | | 1.0000 | 0.7233 | |  |

Herd typea: Beef (reference), Dairy, Suckler, Other.

LandParcelsb: Number of farm subdivisions.

Habitatc: Extent (ha) of each habitat type within the spatial buffer.

Clearfelld: Extent (ha) of forest cut within the spatial buffer during the indicated time lag.

Deere: Relative deer densities (per 25 km2) for 2015 at the farm centroid.

ActiveSettf: Density (per 25 km2) at the farm centroid of active badger setts (from 2012–2020).

Significance codes: 0 ‘***’ 0.001 ‘**’ 0.01 ‘*’ 0.05 ‘.’ 0.1 ‘ ’ 1
